# Supplementary material
Source: PubMed Central journal article supplement (PMC2592041)
Supplement: supp_7_4_361__2.pdf [file supp_7_4_361__2.pdf]

**IMMEDIATE FEEDBACK ASSESSMENT TECHNIQUE (IF AT®)**

Name \_\_\_\_\_ Test # \_\_\_\_\_  
Subject \_\_\_\_\_ Total \_\_\_\_\_

**SCRATCH OFF COVERING TO EXPOSE ANSWER**

|     | A | B | C | D | E | Score |
|-----|---|---|---|---|---|-------|
| 1.  |   |   |   |   |   | _____ |
| 2.  |   |   |   |   |   | _____ |
| 3.  |   |   |   |   |   | _____ |
| 4.  |   |   |   |   |   | _____ |
| 5.  |   |   |   |   |   | _____ |
| 6.  |   |   |   |   |   | _____ |
| 7.  |   |   |   |   |   | _____ |
| 8.  |   |   |   |   |   | _____ |
| 9.  |   |   |   |   |   | _____ |
| 10. |   |   |   |   |   | _____ |
